# Supplementary material for: Injection molded nanofluidic chips: Fabrication method and functional tests using single-molecule DNA experiments
Source: Royal Society of Chemistry journal article supplement (doi:10.1039/c0lc00260g), 2010-11-08
Supplement: c0lc00260g.pdf [file c0lc00260g.pdf]

## Supplementary Information

# Injection molded nanofluidic chips: Fabrication method and functional tests using single-molecule DNA experiments†

Pawel Utko,<sup>\*ab</sup> Fredrik Persson,<sup>ac</sup> Anders Kristensen,<sup>a</sup> and Niels B. Larsen<sup>a</sup>

<sup>a</sup> DTU Nanotech, Department of Micro and Nanotechnology, Technical University of Denmark, DK-2800 Kongens Lyngby, Denmark.

<sup>b</sup> Nano-Science Center & Niels Bohr Institute, University of Copenhagen, DK-2100 Copenhagen, Denmark.

<sup>c</sup> Department of Physics, University of Gothenburg, SE-412 96 Gothenburg, Sweden.

\* E-mail: pawel@fys.ku.dk

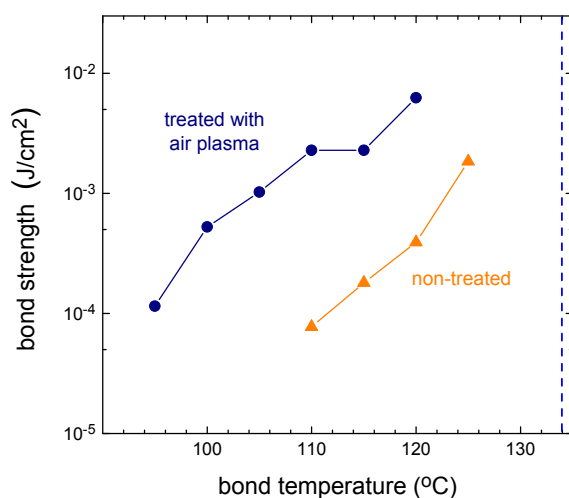

**Fig. S 1** Bond strength with respect to bond temperature. Pairs of flat injection molded discs in Topas 5013 were bonded in a hydraulic press for 10 min at a piston force of 15kN. The bond strength  $\gamma = 3Et_s^3t_b^2/(32L^4)$  was measured using a razor blade test,<sup>1</sup> for disc pairs that were either treated or non-treated with the air plasma as described in the main text. Here,  $E = 3.2$  GPa is the Topas 5013 modulus of elasticity,  $t_s = 2$  mm the thickness of a single disc,  $t_b = 0.25$  mm thickness of the razor blade, and  $L$  is the length of the delaminated region. Solid lines guide the eye, whereas the vertical dashed line indicates  $T_g = 134^\circ\text{C}$  of Topas 5013. Note semi-log scale.

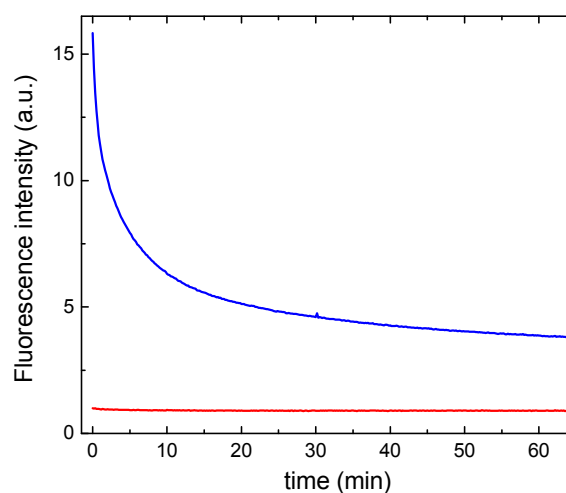

**Fig. S 2** Autofluorescence intensity of nanochannel array area measured as a function of time under continuous illumination with metal halide lamp at 200 W output power. The same fluorescence microscopy setup with FITC filter cube (excitation: 465-495 nm, dichroic mirror: 505 nm, emission: 515-555 nm, Nikon) was used as for DNA experiments described in the main text. (Upper trace) Measurements taken for injection molded Topas 5013 chip sealed with 150 $\mu\text{m}$  thick Topas 6013 foil. (Lower trace) Measurements taken for Si/SiO<sub>2</sub> chip sealed with 550 $\mu\text{m}$  thick Borofloat glass lid.

## References

- 1 W. P. Maszara, G. Goetz, A. Caviglia and J. B. McKittrick, *J. Appl. Phys.*, 1988, **64**, 4943–4950.
